# Supplementary material for: Solid phase microextraction coupled to liquid chromatography-inductively coupled plasma mass spectrometry for the speciation of organotin compounds in water samples
Source: Royal Society of Chemistry journal article supplement (doi:10.1039/b810786f), 2008-12-05
Supplement: b810786f-s3.pdf [file b810786f-s3.pdf]

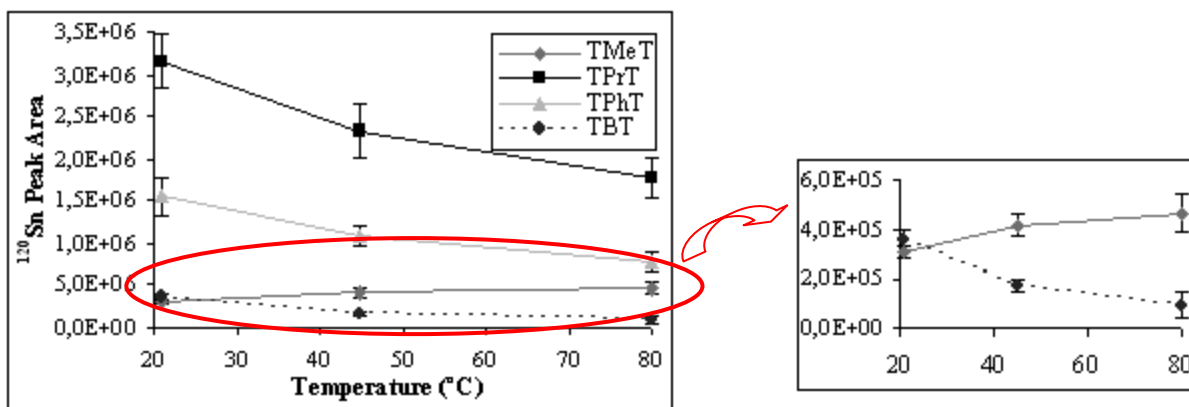

**Fig. S3.** Effect of temperature on extraction efficiency. The fiber was exposed to samples containing  $5 \mu\text{g L}^{-1}$  of each compound as Sn and  $75 \text{g L}^{-1}$  of NaCl. Each point is the average of the three data points.
